# Supplementary material for: Human Bone Marrow Stromal Cells: A Reliable, Challenging Tool for In Vitro Osteogenesis and Bone Tissue Engineering Approaches
Source: Hindawi journal article supplement (doi:10.1155/2016/7842191), 2016-01-01

## **Supplemental information**

### **Material and methods**

#### ***Isolation and cultivation of human bone marrow stromal cells (hBMSC)***

hBMSC were isolated from bone marrow aspirates. Briefly, about 10 ml of one marrow aspirate were diluted 1:5 in phosphate-buffered saline (PBS) (Gibco via ThermoFisher Scientific, Germany). About 20 ml of the diluted bone marrow were applied to a Percoll (Biochrom, Berlin, Germany) density gradient ( $d = 1.073 \text{ g/ml}$ ) and centrifuged at 900xg for 30 min at 25 °C. Mononuclear cells in the interface were harvested, filtered through a nylon cell strainer (100  $\mu\text{m}$ , Becton Dickinson, Heidelberg, Germany), and washed twice with 0.5% human serum albumin in PBS. The cells were re-suspended in Dulbecco's modified essential medium (DMEM) (Gibco) containing 10% heat-inactivated fetal calf serum (HI-FCS; Biochrom, Berlin, Germany) and seeded into 75  $\text{cm}^2$  cell culture flasks (T75, Greiner bio-one, Frickenhausen, Germany) and incubated in 5%  $\text{CO}_2$ -atmosphere at 37°C. After 24 h, non-adherent cells were removed by washing with PBS. The medium was changed twice per week. These passage 0 (P0; after isolation) cells need about 3-4 weeks to become confluent.

#### ***Gene expression analysis***

For analysis of gene expression real time PCR was performed according to following protocol. After an initial activation step for 5 min at 95°C, 50 PCR cycles were run (denaturation at 95°C for 5 sec; annealing and synthesis at 60°C for 10 sec). Primers were constructed by use of *Universal Probe Library* (Roche, Mannheim Germany) (see Table 1 for detailed information). Identity of the PCR products was verified by sequence analysis. The same single stranded cDNA was used to analyze the expression of the gene of interest and the house-keeping gene beta-actin. The relative expression values were counted using the

comparative quantification method of the RotorGene software release 6.0. For quantitation, values are normalized to hBMSC in P2 in BM (passaging) or hBMSC in BM at day 1 (time course).

## Supplemental figure captures

Figure 1S1 *Osteogenic differentiation potential of hBMSC (TNAP activity)*. hBMSC in passage 1 were plated in BM (basic medium) onto TCPS (=P2). From day 4 after plating, the cells were cultured either in BM or in OM/D (osteogenic differentiation medium) and analyzed at day 15 after plating for TNAP activity with p-nitrophenylphosphate as a substrate; the calculation of TNAP activity was performed with a linear calibration curve obtained with p-nitrophenolate ( $r=0.9979$ ). TNAP activity was normalized to the protein content of the lysates. The donors were grouped according their age (and gender) into three subgroups (18-25yrs., 26-25 yrs., and > 35 yrs.) and analysed separately for statistical significance. Significant differences of OM/D mean vs. BM mean values were analysed by paired t-test and indicated with **c** ( $p<0.001$ ); the number of analysed donors is indicated in the graphs.

Figure 1S2 *Osteogenic differentiation potential of hBMSC (comparison of females and males groups)*. hBMSC in passage 1 were plated in BM (basic medium) onto TCPS (=P2). From day 4 after plating, the cells were cultured either in BM or in OM/D (osteogenic differentiation medium) and analyzed at day 15 after plating for TNAP activity as described. The donors were grouped according their age into three subgroups (18-25yrs., 26-25 yrs., and > 35 yrs.) and analysed for statistical differences of endogenous TNAP activity, TNAP activity in OM/D, and inducibility. Significant differences between females and males were analysed by unpaired t-test and indicated with **b** ( $p<0.01$ ) and **c** ( $p<0.001$ ); the number of analysed donors is given in table 2.

Figure 1S3 *Osteogenic differentiation potential of hBMSC (comparison of age groups)*. hBMSC in passage 1 were plated in BM (basic medium) onto TCPS (=P2). From day 4 after plating, the cells were cultured either in BM or in OM/D (osteogenic differentiation medium) and analyzed at day 15 after plating for TNAP activity as described. The donors were grouped

according to their age into three subgroups (18-25 yrs., 26-35 yrs., and > 35 yrs.) and analysed for statistical differences of endogenous TNAP activity, TNAP activity in OM/D, and inducibility. Significant differences between age groups were analysed by one-way ANOVA with Bonferroni's post-test and indicated with **b** ( $p < 0.01$ ); the number of analysed donors is given in table 2.

**Figure 2S**     *Correlation of TNAP inducibility to frequency of certain inducibility values.* hBMSC in passage 1 were plated in BM (basic medium) onto TCPS (=P2). From day 4 after plating, the cells were cultured either in BM or in OM/D (osteogenic differentiation medium) and analyzed at day 15 after plating for TNAP activity as described. For the age groups the inducibility of TNAP activity (TNAP activity in OM/D:TNAP activity in BM) was plotted against the frequency of certain inducibility value. The data points were analysed by non-linear curve fit and resulted in a Gaussian distribution. The peak characteristics ( $x_{max}$ ,  $y_{max}$ ) are indicated in the graphs; the number of donors is given in graphs.

**Figure 3S**     *Correlation of donor age with TNAP activity and inducibility.* hBMSC in passage 1 were plated in BM (basic medium) onto TCPS (=P2). From day 4 after plating, the cells were cultured either in BM or in OM/D (osteogenic differentiation medium). At day 15 after plating, the cells were analyzed for TNAP activity as described above. Data for endogenous TNAP activity, TNAP activity in OM/D, and TNAP inducibility separately for females and males donor age group were plotted each in one graph. The lines indicate linear curve fit. Regression characteristics (p-value, R-square) and the number of analyzed donors are given in table 2.

**Figure 4S**     *Influence of passaging on cell number and doubling time.* hBMSC in passage 1 were plated in BM (basic medium) onto TCPS (=P2), trypsinized and counted after 7 days

in culture. Then the cells were re-plated in the same density for the next passage until P10. Cell numbers (white columns) and calculated doubling time (black columns) of each passage are shown as mean  $\pm$  SEM, n=4.

## Supplemental figures

Figure 1S1

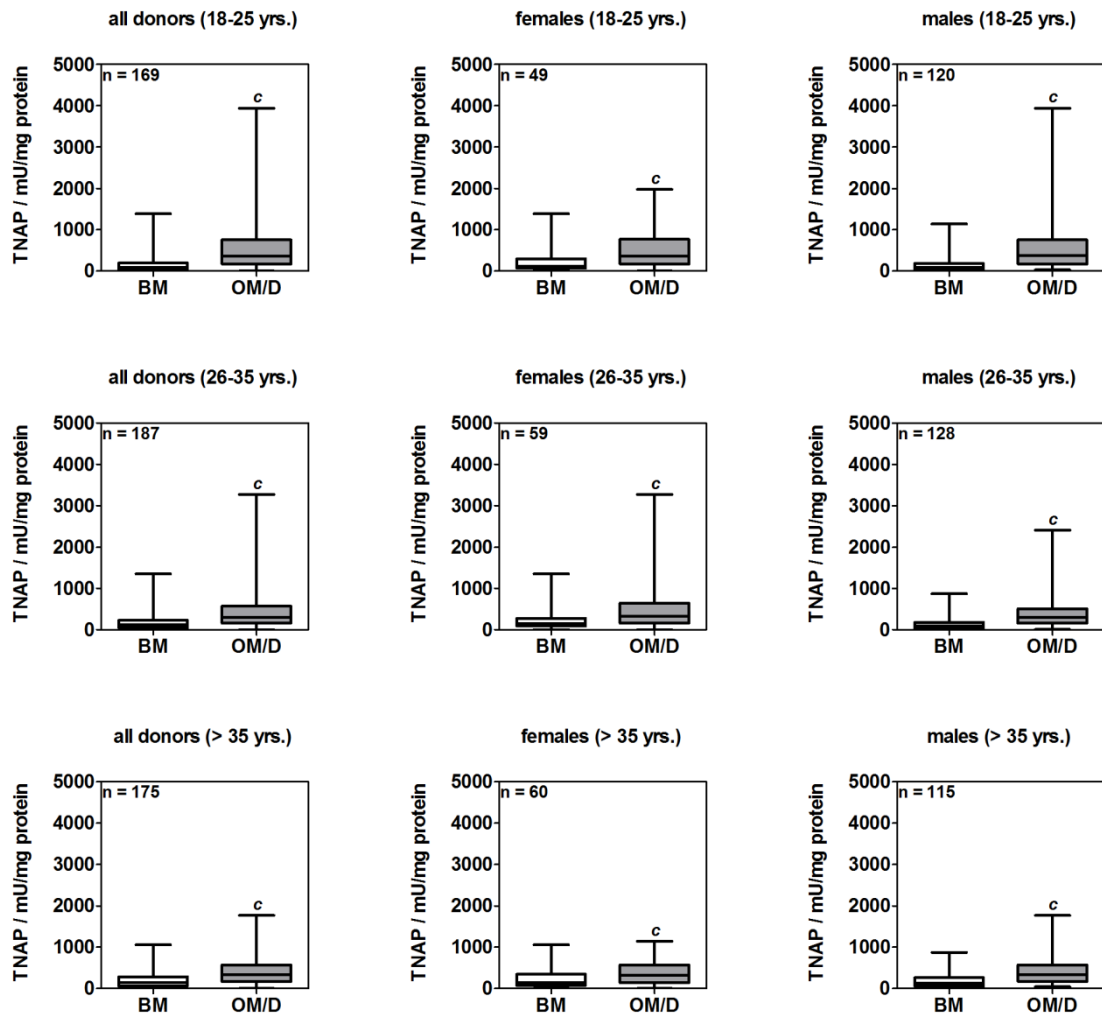

Figure 1S2

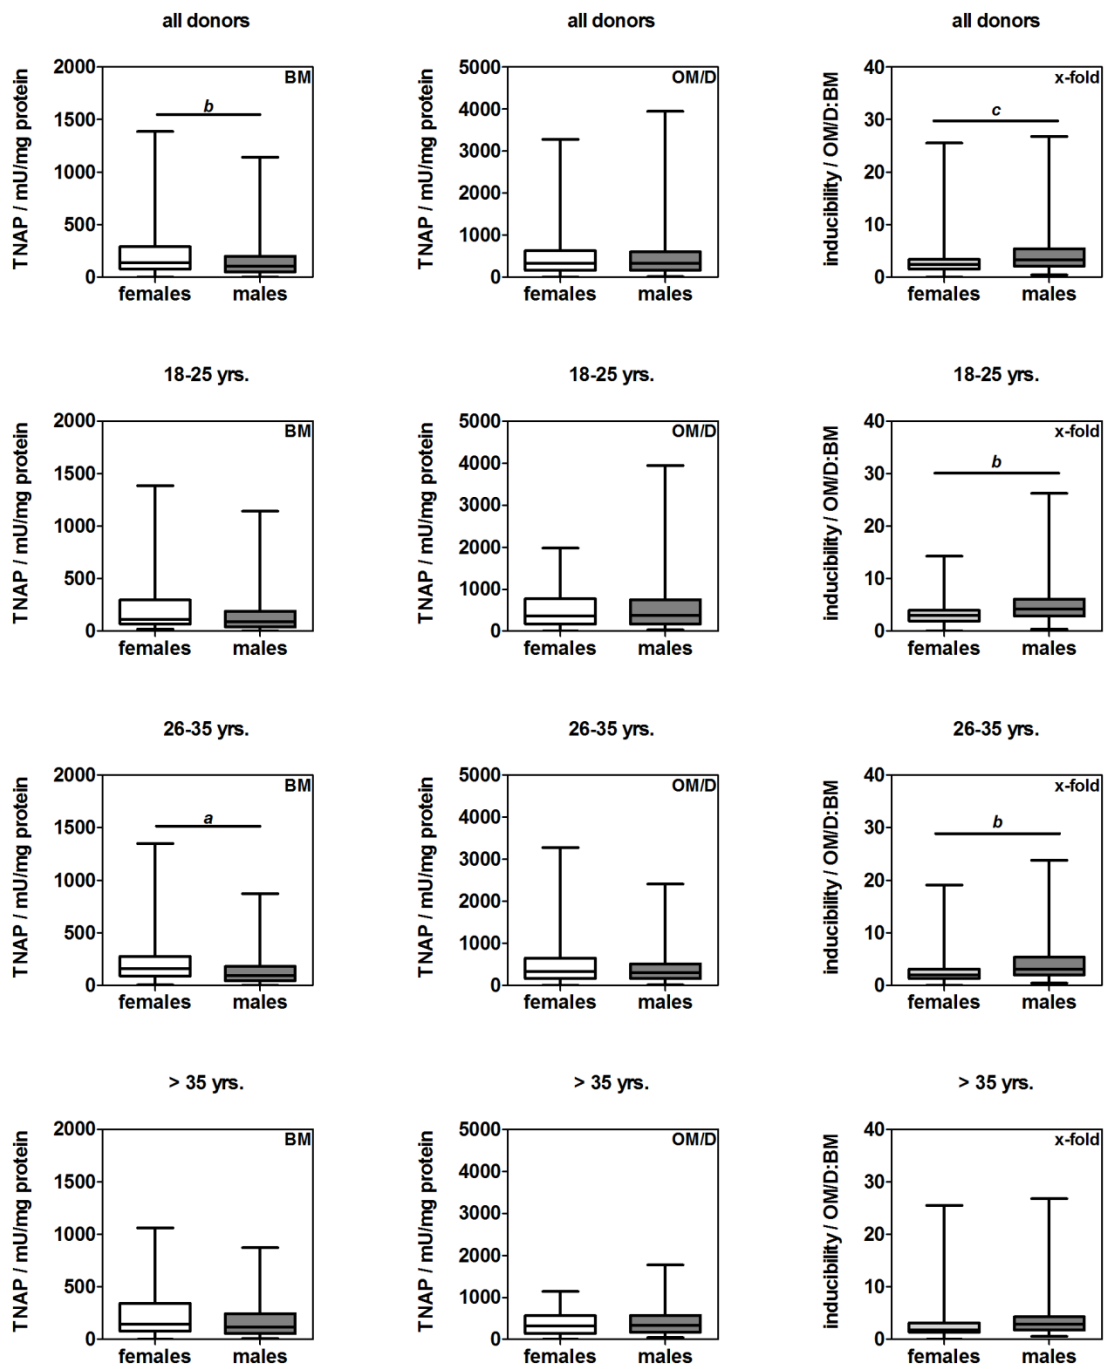

Figure 1S3

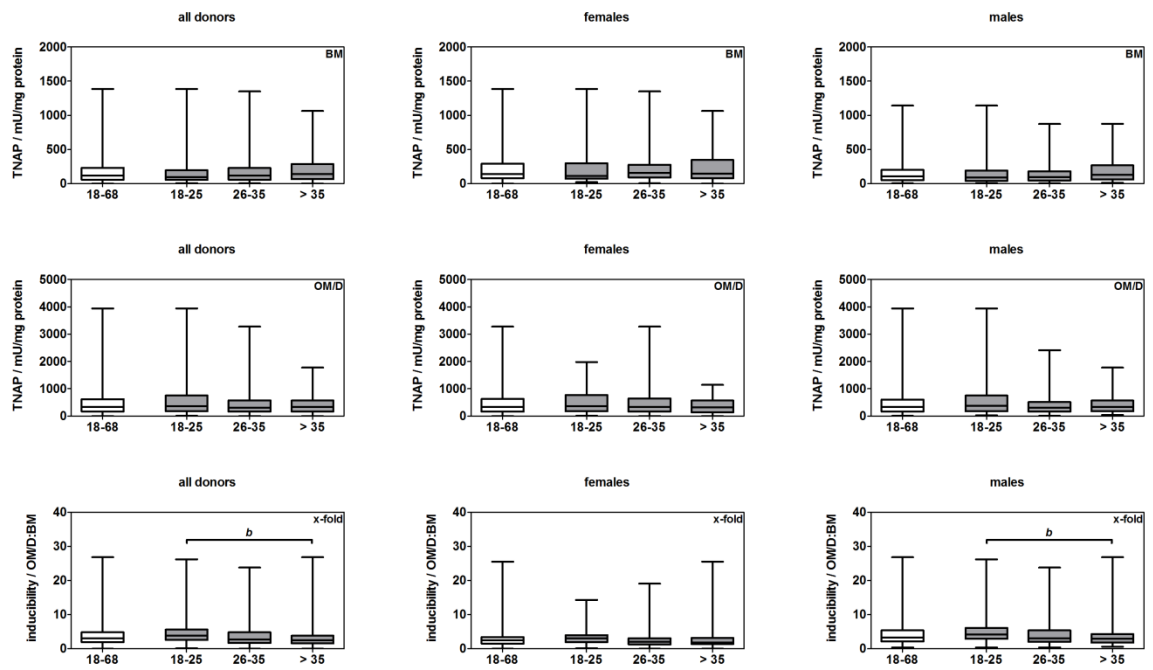



Figure 2S

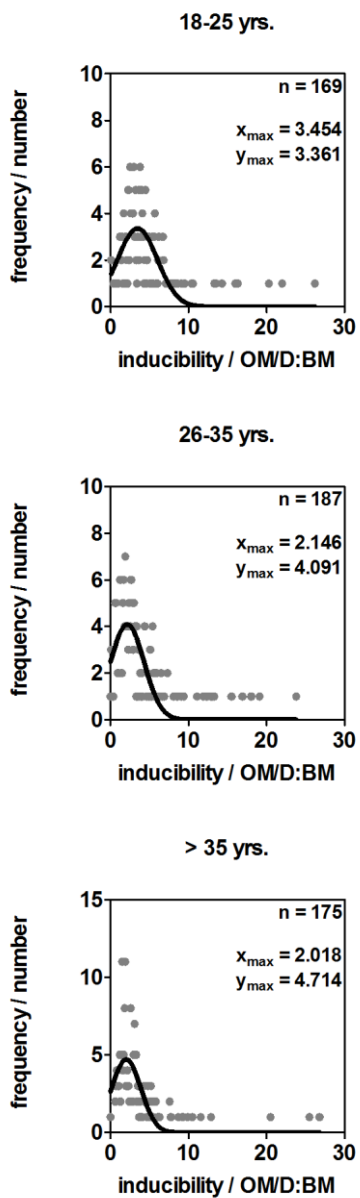

Figure 3S

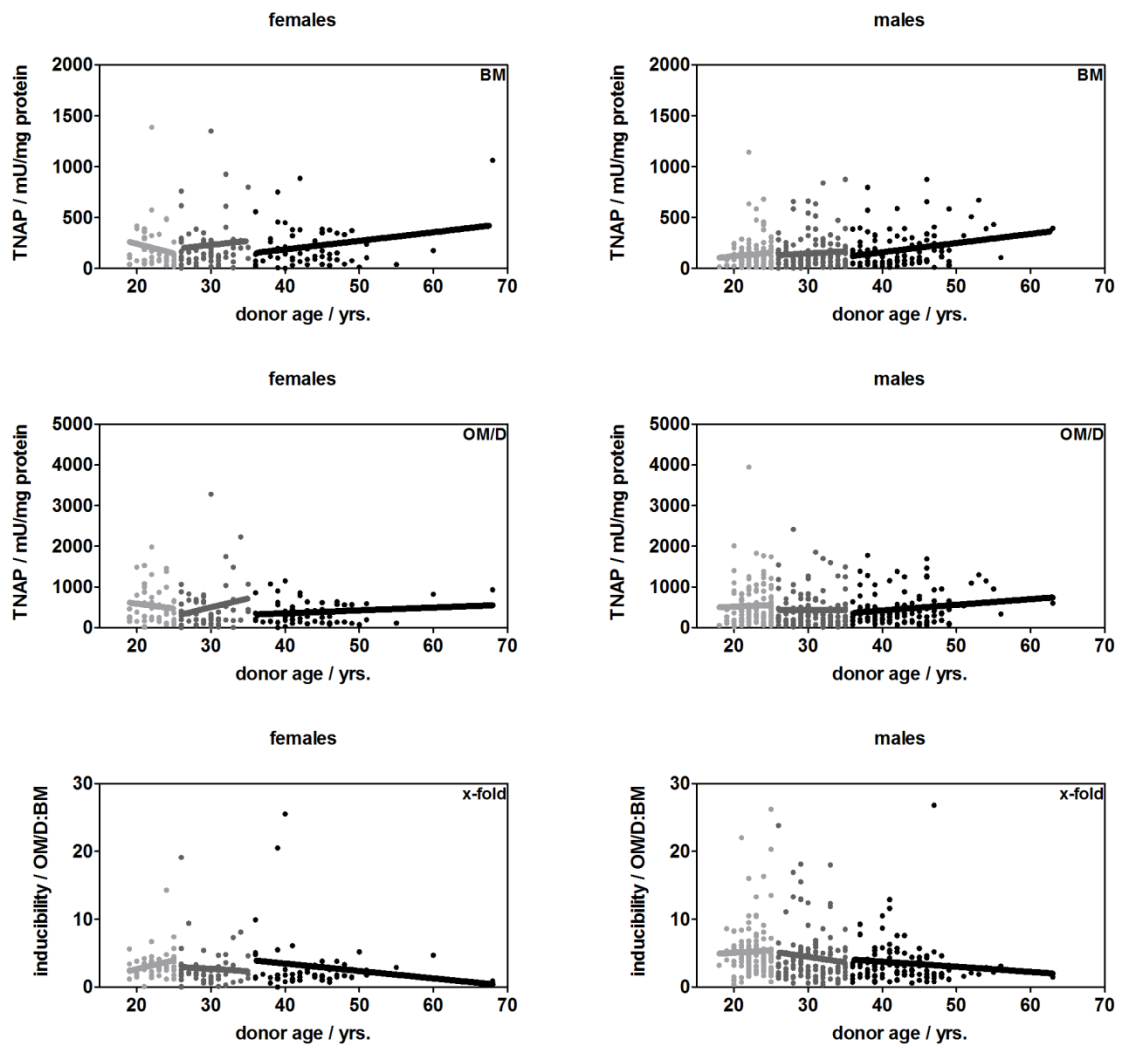

Figure 4S

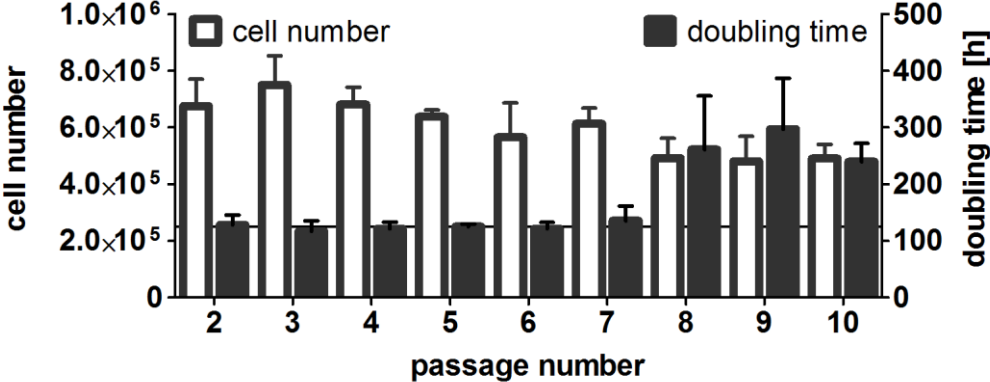

Supplement: f1 [file 7842191.f1.pdf]
